# Supplementary material for: Epithelial retinoic acid receptor β regulates serum amyloid A expression and vitamin A-dependent intestinal immunity
Source: PubMed Central journal article supplement — Proc Natl Acad Sci U S A. 2019 May 16;116(22):10911–6. doi: 10.1073/pnas.1812069116 (PMC6561173; doi:10.1073/pnas.1812069116), 2019-05-16
Supplement: pnas.1812069116.sapp.pdf [file pnas.1812069116.sapp.pdf]

# Supplementary Information for

## Epithelial retinoic acid receptor $\beta$ regulates serum amyloid A expression and vitamin A-dependent intestinal immunity

Sureka Gattu<sup>a</sup>, Ye-Ji Bang<sup>a</sup>, Mihir Pendse<sup>a</sup>, Chaitanya Dende<sup>a</sup>, Andrew L. Chara<sup>a</sup>, Tamia A. Harris<sup>a,b</sup>, Yuhao Wang<sup>a</sup>, Kelly A. Ruhn<sup>a</sup>, Zheng Kuang<sup>a</sup>, Shanthini Sockanathan<sup>c</sup>, and Lora V. Hooper<sup>a,d</sup>

<sup>a</sup>Department of Immunology, The University of Texas Southwestern Medical Center, Dallas, TX 75390

<sup>b</sup>Department of Dermatology, The University of Texas Southwestern Medical Center, Dallas, TX 75390

<sup>c</sup>The Solomon H. Snyder Department of Neuroscience, Johns Hopkins University School of Medicine, Baltimore, MD 21205

<sup>d</sup>The Howard Hughes Medical Institute, The University of Texas Southwestern Medical Center, Dallas, TX 75390

Corresponding Author: Lora V. Hooper

Email: [lora.hooper@utsouthwestern.edu](mailto:lora.hooper@utsouthwestern.edu)

### **This PDF file includes:**

- Extended Materials and Methods
- Figs. S1 to S12
- Tables S1 to S6
- References for SI reference citations

## Extended Materials and Methods

**Quantitative PCR.** Total RNA was isolated from cells or homogenized tissues using the RNeasy Lipid Tissue Kit (Qiagen). cDNAs were synthesized using MMLV reverse transcriptase (ThermoFisher). Expression of mouse *I17a* and human *RAR* genes were analyzed using Taqman gene expression qPCR assays (Invitrogen). Mouse *Saa* and human *SAA* genes were analyzed using SYBR Green qPCR reagents and specific primers (Table S5). Relative expression values were determined using the comparative  $C_t$  ( $\Delta\Delta C_t$ ) method, and transcript abundances were normalized to *Gapdh* transcript abundance.

**siRNA knockdown.** MODE-K or HepG2 cells cultured in a serum-free medium for 48 hours were trypsinized and plated at  $5 \times 10^4$  cells per well of a 12-well cell culture plate. OptiMEM transfection reagent (Invitrogen) was combined with diluted siRNA pools (sequences are listed in Table S6) then added to freshly split cells. After gentle mixing, additional experimental treatments were added. MODE-K cells were treated for 24 hours with retinol (100 nM; Sigma) and lipopolysaccharide (100 ng/ml; Sigma). HepG2 cells were treated for 24 hours with retinol (100 nM), IL-1 $\beta$  (50 pg/ml; R&D Systems), and IL-6 (100 pg/ml; R&D Systems). Cells were harvested 24 hours post-treatment.

**Transcriptional reporter assays.** A 4103bp (-4000 to +103) fragment of the *Saa3* promoter was cloned into the pEZX-G04 vector containing two reporter genes (Genecopioieia) to generate the wild-type reporter construct. The putative RAR binding site in the wild-type reporter construct was mutated from TGCCTTctttcTGCCCC to TGCCATctttcAGCCCC to generate the mutant reporter construct (Invitrogen GeneArt Site-Directed Mutagenesis Plus).  $5 \times 10^4$  MODE-K cells were transfected with 400 ng of wild-type or mutant reporter plasmid or 400 ng of empty

vector. Cells were treated with retinol (100 nM) and LPS (100 ng/ml) for 24 h. Luciferase activity was measured using the Secreted-Pair Luminescence Assay Kit (Genecopoeia) and measured with a SpectraMax M5e plate reader (Molecular Devices). Gaussia luciferase (GLuc) activity was normalized against secreted alkaline phosphatase (SEAP) activity and then compared to the activity of cells transfected with pEZX-G04 alone.

**Laser capture microdissection and RNA purification.** Laser capture microdissection was performed as described (1). In brief, 5 cm of distal small intestine was washed and snap-frozen in optimum cutting temperature (OCT) compound (Fisher 23-730.571). Frozen sections were cut to a thickness of 7  $\mu$ m and fixed in 70% ethanol, then stained with Methyl Green and eosin. Freshly stained sections were immediately used for laser capture microdissection of intestinal epithelial cells using an Arcturus PixCell IIe system, and 5,000-10,000 pulses were obtained from each section. RNA was extracted from isolated intestinal epithelial cells by incubating with 14  $\mu$ l RNA Extraction Buffer from the PicoPure RNA Isolation Kit (Life Technology 12204-01) for 30 min, then stored at -80°C until use. Extracted RNA was purified using PicoPure RNA Isolation Kit following the manufacturer's protocol. RNA quality and concentration were determined by Agilent 2100 Bioanalyzer or RiboGreen S2 RNA Assay Kit (Thermo Fisher R11490).

**RNA sequencing (RNAseq) and data analysis.** RNA was extracted and purified from ileums of 3 mice per experimental group. RNA quality was assessed on an Agilent 2100 Bioanalyzer. Sequencing libraries were prepared using the TruSeq RNA sample preparation kit v2 (Illumina) and sequenced on an Illumina HiSeq 2500 for signal end 50 bp length reads. Sequence data were mapped against the mm10 genome using TopHat (2) and FPKMs were generated using Cuffdiff (3) with default parameters. Altered expression was defined as a >2 fold increase or decrease in average FPKM reads compared between the two groups.

**RNAseq Ontology Analysis.** RNAseq identified 832 genes were differentially expressed, greater than 2-fold, and with  $p$  values  $<0.05$ . These 832 genes were analyzed with the PANTHER Gene Ontology Classification System to identify enriched GO Biological Processes. The top 20 differentially regulated GO Biological Processes (gene categories) are shown in Fig. 3D, organized as immunity-related and metabolism-related genes. Bonferroni correction for multiple testing and a  $p$  value filter of  $<0.05$  were applied to the PANTHER analysis.

**Retinoid Quantification.** Retinol and retinoic acid (Sigma) were freshly reconstituted in ethanol and quantified under red or amber lighting. Quantification based on absorbance at 325 nm (retinol) and 350 nm (retinoic acid) is in accordance with previously published molar extinction coefficients (4). Retinoids for use in cell culture treatments were utilized in a vehicle of 0.1% ethanol in cell culture medium.

**Flow Cytometry Reagents and Antibodies.** Foxp3/transcription factor staining reagents for fixation and permeabilization were used (eBiosciences). Zombie Yellow (Biolegend) fixable viability dye was used to gate live cells prior to further analysis. Antibodies used to characterize Th17 populations include: CD45-FITC (Biolegend), CD4-PECy7 (Biolegend), CD3-APC-Cy7 (Biolegend), RORgt-PE (eBiosciences), IL-17a-BV421 (BD Bioscience), IL-22-APC (eBiosciences). Antibodies used to characterize gut homing T cells include: CD3-APC (R&D Systems), CD45-FITC (Biolegend), CD4-PECy7 (Biolegend), CCR9-PE (Biolegend),  $\alpha 4\beta 7$ -Pacific Blue (BD Bioscience). Antibodies used to characterize Foxp3 T regulatory (Treg) cells include Foxp3-PE-Cy5 (eBiosciences), CD45-FITC (eBiosciences), CD4-Brilliant Violet 421 (Biolegend), CD3-PE (eBiosciences). Antibodies used to characterize IgA-producing B cells include: CD45-BV650 (Biolegend), CD19-FITC (eBiosciences), B220-APC (eBiosciences), and IgA-PE (eBiosciences). Antibodies used to characterize dendritic cell populations include CD45-

Pacific Blue (Biolegend), CD11c-APC-Cy7 (eBiosciences), CD103-FITC (Biolegend), MHCII-BV711 (eBiosciences), CD11b-PE (Biolegend), and F480-APC (eBiosciences).

### **16S rRNA gene sequencing and data analysis**

Fecal samples were collected from *Rarb<sup>f/f</sup>* and *Rarb<sup>ΔIEC</sup>* littermates that were co-caged. Fecal DNA was purified using the FastDNA Spin Kit (MP Biomedicals 116560-200) and a FastPrep-24 Homogenizer. Sequencing libraries were prepared using the HotStarTaq Plus Master Mix Kit (Qiagen) with primers flanking variable regions V3-V4. Sequencing was performed on a MiSeq following the manufacturer's guidelines. Operational taxonomic units (OTUs) were defined by clustering at 3% divergence (97% similarity). Final OTUs were taxonomically classified using BLASTn against a curated database derived from RDP II and NCBI. Principle component analysis was performed using the "prcomp" function in R and differential abundance analysis was performed using DESeq2 (5).

**IgA ELISA.** Total protein was isolated by homogenizing mouse feces in PBS with protease inhibitor cocktail (Roche). Homogenates were rotated at 4°C for 4 h and centrifuged at 16,000g for 15 min. IgA were quantified per manufacturer instructions (Invitrogen).

**Histology.** Paraffin embedded sections of Bouin's fixed mouse distal ileum were cut, and heat-induced epitope retrieval was performed in a 0.05% sodium citrate buffer (pH 6.0). The slides were incubated with rabbit anti-mouse SAA antiserum (6)(1:50 dilution) at 4°C overnight and then detected with a goat anti-rabbit IgG Cy3 conjugate (Biomeda). Tissues were counterstained with DAPI and images were captured on a Zeiss AxioImager M1 microscope. H&E and PAS staining were performed by the UTSW Histology Core.

## Supplementary Information References

1. Stappenbeck TS, Hooper LV, Manchester JK, Wong MH, Gordon JI (2002) Laser capture microdissection of mouse intestine: characterizing mRNA and protein expression, and profiling intermediary metabolism in specified cell populations. *Methods Enzymol* **356**:167-196.
2. Trapnell C, Pachter L, Salzberg SL. (2009) TopHat: discovering splice junctions with RNAseq. *Bioinformatics* **25**:1105-1111.
3. Trapnell, C, et al. (2010) Transcript assembly and quantification by RNA-Seq reveals unannotated transcripts and isoform switching during cell differentiation. *Nat Biotechnol* **28**:511-515.
4. Gundersen TE, Blomhoff R (2001) Qualitative and quantitative liquid chromatographic determination of natural retinoids in biological samples. *J Chromatogr A* **935**:13-43.
5. Love MI, Huber W, Anders S (2014) Moderated estimation of fold change and dispersion for RNA-seq data with DESeq2. *Genome Biol* **15**: 550.
6. Derebe MG, et al. (2014) Serum amyloid A is a retinol binding protein that transports retinol during bacterial infection. *Elife* **3**:e03206.
7. Podvinec M, Kaufmann MR, Handschin C, Meyer UA (2002) NUBIScan, an in silico approach for prediction of nuclear receptor response elements. *Mol Endocrinol* **16**:1269-1279.
8. Wang Y, et al. (2017) The intestinal microbiota regulates body composition through NFIL3 and the circadian clock. *Science* **357**:912-916.
9. Chapellier B, et al. (2002) A conditional floxed (loxP-flanked) allele for the retinoic acid receptor  $\alpha$  (RAR $\alpha$ ) gene. *Genesis* **32**:87-90.
10. Madison BB, et al. (2002) Cis elements of the villin gene control expression in restricted domains of the vertical (crypt) and horizontal (duodenum, cecum) axes of the intestine. *J Biol Chem* **277**:33275-33283.
11. Sano T, et al. (2015) An IL-23R/IL-22 circuit regulates epithelial serum amyloid A to promote local effector Th17 responses. *Cell* **163**:381-393.
12. Iwata M, et al. (2004) Retinoic acid imprints gut-homing specificity on T cells. *Immunity* **21**:527-538.
13. Mora JR, et al. (2006) Generation of gut-homing IgA-secreting B cells by intestinal dendritic cells. *Science* **314**:1157-1160.

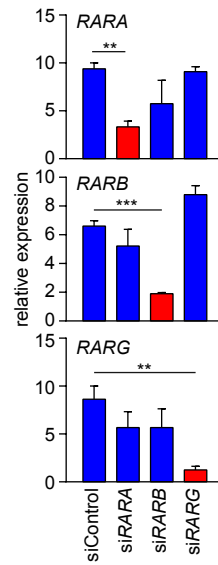

**Figure S1: siRNA knockdown of *RAR* expression in HepG2 cells.** HepG2 cells were treated for 24 hours with retinol (100 nM), IL-1 $\beta$  (50 pg/ml), IL-6 (100 pg/ml), and were transfected with siRNAs targeting each of the three *RAR* isoforms. A scrambled siRNA was used as a negative control (siControl). *RAR* expression was quantified by qPCR analysis. Assays were performed in triplicate and represent three independent experiments. Means $\pm$ SEM are plotted. \*\* $P$ <0.01, \*\*\* $P$ <0.001 as determined by Student's *t*-test.

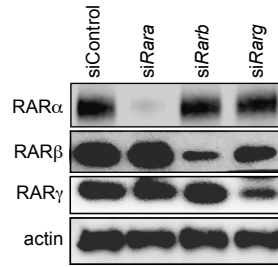

**Figure S2: siRNA knockdown of RAR expression in MODE-K cells.** MODE-K cells were treated for 24 hours with retinol (100 nM), IL-1 $\beta$  (50 pg/ml), IL-6 (100 pg/ml), and were transfected with siRNAs targeting each of the three *Rar* isoforms. RAR $\alpha$ ,  $\beta$ , and  $\gamma$  were detected by Western blot using antibodies specific to each isoform, with actin as a loading control. The blot is representative of three independent experiments.



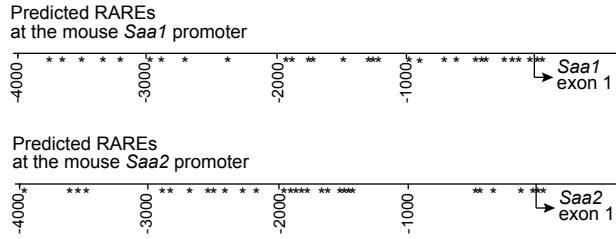

**Figure S3: Predicted retinoic acid response elements (RAREs) in the mouse *Saa1* and *Saa2* promoters.** *In silico* analysis of the *Saa1* and *Saa2* promoter regions using NUBIScan (7) identified predicted RARE sequences in each promoter.

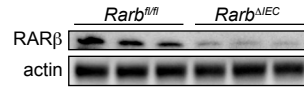

**Figure S4: Epithelial cell-specific deletion of *Rarb* in mice.** *Rarb*<sup>ΔIEC</sup> mice were created by crossing *Rarb*<sup>fl/fl</sup> mice with mice carrying a *Villin-Cre* transgene. Epithelial cells were isolated from *Rarb*<sup>ΔIEC</sup> and *Rarb*<sup>fl/fl</sup> mice by treatment with 10 mM EDTA as previously described (8). RARβ was detected by Western blot, with actin as a loading control.

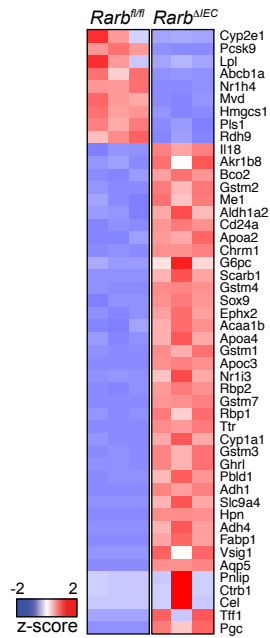

**Figure S5: Altered expression of metabolism genes in small intestines from mice with an epithelial cell-specific deletion of *Rarb*.** RNAseq analysis was performed on small intestines from *Rarb<sup>fl/fl</sup>* and *Rarb<sup>ΔIEC</sup>* mice. Gene ontology (GO) biological process enrichment analysis of differentially regulated genes is shown in Fig. 3D, with metabolic gene categories highlighted in blue. Heat map shows expression levels of the 48 genes identified as having metabolic functions by the GO analysis, and which also had a  $-\log_{10}(P \text{ value}) > 5$ .

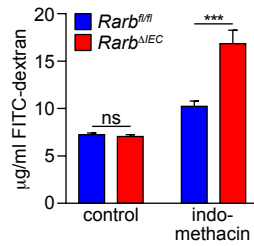

**Figure S6: Intestinal permeability measurements in  $Rarb^{fl/fl}$  and  $Rarb^{\Delta IEC}$  mice.** Serum concentrations of FITC-dextran 4 hours after oral gavage are shown. As a positive control, intestinal epithelial damage was induced by pretreatment with indomethacin (15 mg/kg in DMSO) for 1 hour prior to FITC-dextran administration (600 mg/kg body weight; 4 kDa; Sigma).  $N=3$  mice/group, and each sample was analyzed in triplicate. Means $\pm$ SEM are plotted. \*\*\* $P<0.001$  as determined by Student's  $t$ -test. ns, not significant.

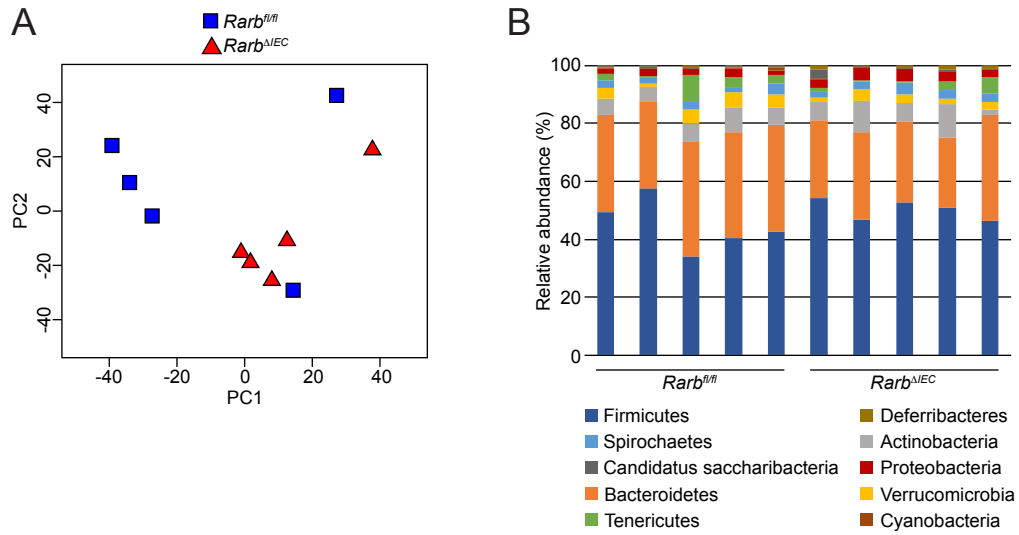

**Figure S7: The intestinal microbiotas of  $Rarb^{fl/fl}$  and  $Rarb^{\Delta IEC}$  mice are similar.** (A) Principal coordinate analysis of 16S rRNA sequencing of fecal samples from  $Rarb^{fl/fl}$  and  $Rarb^{\Delta IEC}$  mice. The mice were littermates of heterozygous crosses that remained cohoused. Each dot represents one mouse. (B) Relative abundances of bacterial genera in  $Rarb^{fl/fl}$  and  $Rarb^{\Delta IEC}$  mice.

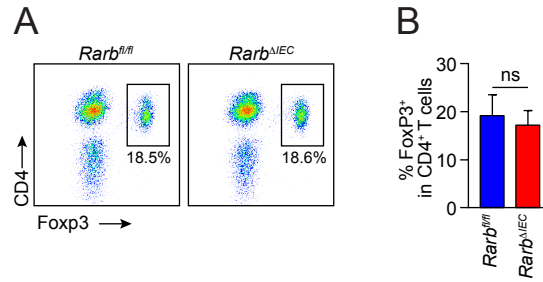

**Figure S8: T<sub>reg</sub> cell frequencies are similar in the intestines of *Rarb<sup>fl/fl</sup>* and *Rarb<sup>ΔIEC</sup>* mice.**

(A) Representative flow cytometry plots of T cells (CD45<sup>+</sup> CD3<sup>+</sup> CD4<sup>+</sup>) expressing Foxp3, which marks T<sub>reg</sub> cells. The T cells were isolated from the small intestines of *Rarb<sup>fl/fl</sup>* and *Rarb<sup>ΔIEC</sup>* littermates. (B) Quantification of T<sub>reg</sub> frequencies in A. N=8 (*Rarb<sup>fl/fl</sup>*) and 6 (*Rarb<sup>ΔIEC</sup>*) mice per group from two independent experiments. ns, not significant as determined by Student's *t*-test.

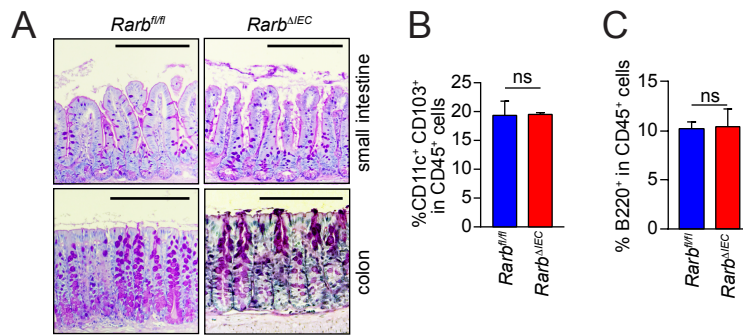

**Figure S9: Numbers of Paneth cells and goblet cells, and frequencies of CD11c<sup>+</sup> CD103<sup>+</sup> dendritic cells and B cells are similar in the intestines of *Rarb<sup>fl/fl</sup>* and *Rarb<sup>ΔIEC</sup>* mice.** (A) Periodic Acid Schiff (PAS) staining was performed on small intestines and colons from *Rarb<sup>ΔIEC</sup>* mice and their *Rarb<sup>fl/fl</sup>* littermates in order to detect goblet cells. Scale bars, 220 μm. (B and C) Cell suspensions from the small intestines of *Rarb<sup>ΔIEC</sup>* mice and their *Rarb<sup>fl/fl</sup>* littermates were analyzed by flow cytometry. (B) DCs were identified using antibodies against CD45, CD11c, and CD103. Frequencies of CD11c<sup>+</sup> CD103<sup>+</sup> cells (which include RA-producing DCs) within the CD45<sup>+</sup> cell subset are shown. (C) B cells were identified using antibodies against CD45 and B220. Frequencies of B220<sup>+</sup> cells within the CD45<sup>+</sup> cell subset are shown. *N*=3 mice per group; data represent three independent experiments. Means±SEM are plotted. ns, not significant as determined by Student's *t*-test.

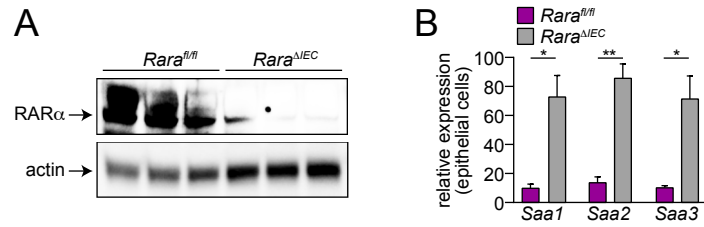

**Figure S10: Epithelial cell RAR $\alpha$  is dispensable for *Saa* expression in the small intestine.** (A) *Rara $\Delta$ IEC* mice were created by crossing *Rara<sup>fl/fl</sup>* (9) with mice carrying a *Villin-Cre* transgene (10). RAR $\alpha$  expression was assessed by Western blotting of small intestinal epithelial cells isolated by EDTA treatment as described (8). Actin was detected as a control. (B) *Saa* expression was measured by qPCR analysis of small intestinal epithelial cells isolated by EDTA treatment as in A. *N*=3 mice per group. \**P*<0.05, \*\**P*<0.01 as determined by Student's *t*-test.



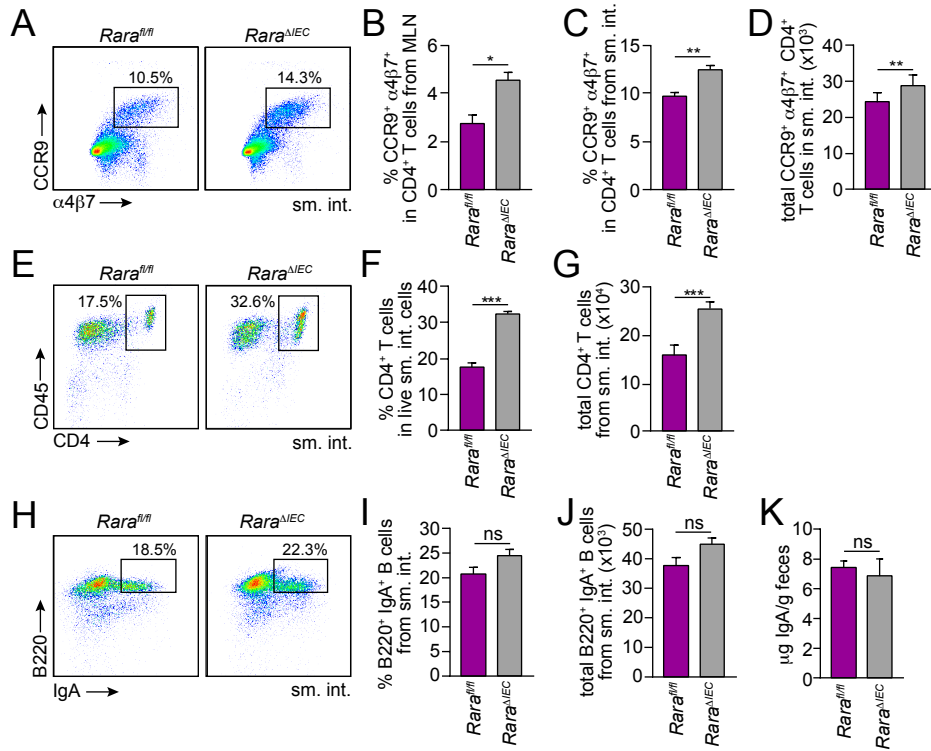

**Figure S11: Epithelial cell  $RAR\alpha$  is dispensable for  $CD4^+$  T cell homing and B cell expression of IgA.** (A-D) Expression of the gut homing markers  $\alpha4\beta7$  and CCR9 on T cells ( $CD4^+$   $CD45^+$   $CD3^+$ ) from *Rara<sup>fl/fl</sup>* and *Rara<sup>ΔIEC</sup>* littermates. (A) Representative flow cytometry plots of small intestinal T cells. Frequencies of CCR9<sup>+</sup>  $\alpha4\beta7^+$  cells in  $CD4^+$   $CD45^+$   $CD3^+$  cells from MLN (B) and small intestine (C). Total gut homing  $CD4^+$  T cell numbers (CCR9<sup>+</sup>  $\alpha4\beta7^+$   $CD45^+$   $CD4^+$   $CD3^+$ ) are given in (D).  $N=3$  mice/group; data represent three independent experiments. (E) Flow cytometry of  $CD4^+$  ( $CD45^+$   $CD3^+$ ) T cells from the small intestines of *Rara<sup>fl/fl</sup>* and *Rara<sup>ΔIEC</sup>* littermates.  $CD4^+$  ( $CD45^+$   $CD3^+$ ) T cell frequencies are quantified in (F) and total small intestinal  $CD4^+$  T cell numbers ( $CD4^+$   $CD45^+$   $CD3^+$ ) are given in (G).  $N=5$  mice per group; data represent two independent experiments. (H) Flow cytometry analysis of IgA<sup>+</sup> B220<sup>+</sup> ( $CD45^+$   $CD19^+$ ) B cells from *Rara<sup>fl/fl</sup>* and *Rara<sup>ΔIEC</sup>* littermates. IgA<sup>+</sup> B220<sup>+</sup> cell frequencies in  $CD45^+$   $CD19^+$  B cells are quantified in (I) and total numbers of small intestinal IgA<sup>+</sup> B cells are shown in (J).  $N=5$  mice per group; data represent two independent experiments. (K) Quantification of fecal IgA by ELISA.  $N=4$  mice/group; data represent two independent experiments. Means $\pm$ SEM are plotted. \* $P<0.05$ , \*\* $P<0.01$ , \*\*\* $P<0.001$  as determined by Student's  $t$ -test. ns, not significant. sm. int., small intestine. MLN, mesenteric lymph nodes.

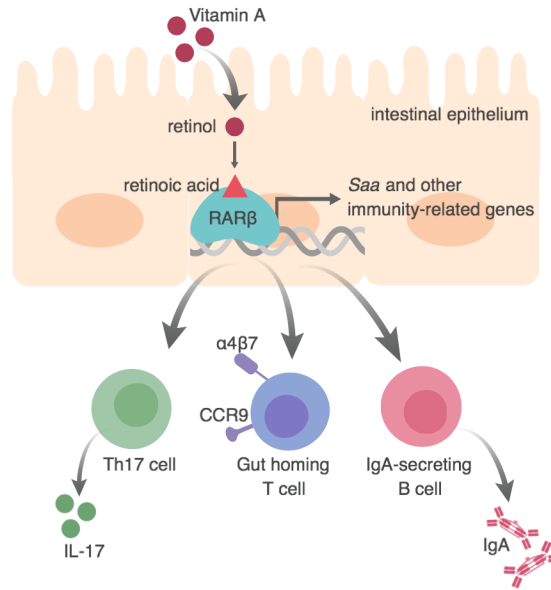

**Figure S12: Epithelial RAR $\beta$  regulates intestinal adaptive immunity.** The transcription factor RAR $\beta$  is activated by retinoic acid, which is derived from dietary vitamin A. Epithelial RAR $\beta$  controls an immune transcriptional program that includes members of the *Saa* family. Epithelial RAR $\beta$  promotes IL-17 production by Th17 cells, which is known to require SAA (11). Epithelial RAR $\beta$  also promotes vitamin A-dependent immune responses that include the generation of gut homing CD4<sup>+</sup> T cells (marked by the gut homing receptors  $\alpha$ 4 $\beta$ 7 and CCR9)(12) and IgA-secreting B cells (13). Our findings reveal a mechanism by which the intestinal epithelium regulates adaptive immunity in response to diet. Schematic was made in ©BioRender (biorender.com).

**Table S1: Predicted RARE sequences in the mouse Saa3 promoter**

| Predicted RARE sequence              | RARE type <sup>1</sup> | RARE location <sup>2</sup> | RAR $\beta$ ChIP fold enrichment |
|--------------------------------------|------------------------|----------------------------|----------------------------------|
| TGAGTGgcttcTGTCCT                    | DR5                    | -3895                      | ND                               |
| TAAGCTaaTGCCCT                       | DR2                    | -3556                      | ND                               |
| AGCTCAgttcaGGTTTA                    | DR5                    | -3537                      | ND                               |
| TGGTCTtcTCTCCT                       | DR2                    | -3142                      | ND                               |
| GAGGCAatAGCTCA                       | DR2                    | -2949                      | ND                               |
| TTGGCTcacgtTGTCCT                    | DR5                    | -2490                      | ND                               |
| TGTCCTagcagTAAGCA                    | DR5                    | -2479                      | ND                               |
| GGTGCCtqtagAGGTCA                    | DR5                    | -2230                      | ND                               |
| AGGTCAgaAAATGA                       | DR2                    | -2116                      | ND                               |
| TTAACTgcTGACCC                       | DR2                    | -2007                      | ND                               |
| TGGACTttttcTTTACT                    | DR5                    | -1915                      | 1.9                              |
| AGTGCAcaccAAGTCC                     | DR5                    | -1832                      | 0.8                              |
| ACAACAacaacAGAGCA                    | DR5                    | -1740                      | 4.7                              |
| ACAACAacAGAGCA                       | DR2                    | -1737                      | ND                               |
| TATCCTgttgTGCCCT                     | DR5                    | -1563                      | 1.8                              |
| AGGACAcaggaGGGACA                    | DR5                    | -1357                      | 1.1                              |
| AGACAAGtgaaGGGTCA                    | DR5                    | -1310                      | 2.5                              |
| TGCACAaggccTGTTCT                    | DR5                    | -1255                      | 0.5                              |
| TGTTCTccTGAATG                       | DR2                    | -1244                      | 0.2                              |
| CGCACAgccccTGGACA                    | DR5                    | -1160                      | 0.2                              |
| TCCTCTaaggaTGCTCT                    | DR5                    | -1134                      | 0.3                              |
| AGACCCagacaTGCTCT                    | DR5                    | -1058                      | 1.1                              |
| TGCTCTgccccTGACTG                    | DR5                    | -689                       | 1.1                              |
| TGAACAaaTTTCCT                       | DR2                    | -603                       | 1.4                              |
| TGGCCAgcaagAGGTCA                    | DR5                    | -463                       | 0.4                              |
| TGAGCTcacacGGGTCT                    | DR5                    | -327                       | 3.6                              |
| <b>TGCCTTctttcTGCCCC<sup>3</sup></b> | <b>DR5</b>             | <b>-224</b>                | <b>4.9</b>                       |
| TCACATaaggtTGCCCT                    | DR5                    | -116                       | 1.1                              |
| AGGTGAtgaatAGTTAA                    | DR5                    | -11                        | 2.9                              |
| TTACCTgcTGAACG                       | DR2                    | 15                         | 0.2                              |

<sup>1</sup>RARE type: The most frequent direct repeats (DRs) with 1, 2, or 5 nucleotides spacing are termed DR1, DR2, and DR5 elements, respectively.

<sup>2</sup>RARE location was determined relative to the Saa3 start site.

<sup>3</sup>RARE -224 was further validated by ChIP and luciferase reporter assay for Saa3 promoter activity as shown in Fig. 2B and C.

**Table S2: Predicted RARE sequences in the mouse *Saa1* promoter**

| mSAA1 | Predicted RARE sequence | RARE type | RARE location |
|-------|-------------------------|-----------|---------------|
| 243   | AGGACAcaccaTGATCT       | DR5       | -3758         |
| 335   | GGATCAcaacaATCCCA       | DR5       | -3666         |
| 558   | AGGTCTtaGGGCA           | DR2       | -3443         |
| 693   | ACTTCAgtataGGAACA       | DR5       | -3308         |
| 874   | AGAGCTagctgGGGACA       | DR5       | -3127         |
| 1056  | GGATGAagAGCTCA          | DR2       | -2945         |
| 1113  | AGGTCActtctTGTA AA      | DR5       | -2888         |
| 1304  | AATTCaCaCGGACA          | DR2       | -2697         |
| 1689  | TGTCCActaggCGGACA       | DR5       | -2312         |
| 2018  | AGACCTgtagcAGGGCA       | DR5       | -1983         |
| 2029  | AGGGCAgtagtAGCACA       | DR5       | -1972         |
| 2234  | GGCTCAgcAGGTCA          | DR2       | -1767         |
| 2330  | AGGGCAtcAGATCT          | DR2       | -1671         |
| 2648  | AGACCAggccaGTCTCA       | DR5       | -1353         |
| 2840  | AGAGCAagACGACA          | DR2       | -1161         |
| 2863  | ATGGCAgaaggAGGAGA       | DR5       | -1138         |
| 2898  | AGCAGAcAAGCTCA          | DR2       | -1103         |
| 3051  | GGTTAAgaAGCACA          | DR2       | -950          |
| 3182  | AGGGGAaggctGGGCA        | DR5       | -819          |
| 3304  | AGTTCCctgtgGGGCA        | DR5       | -697          |
| 3653  | AGGTAAaatggGGGCA        | DR5       | -348          |
| 3664  | GGGGCAgggggAGAACA       | DR5       | -337          |
| 3664  | GGGGCAaggGGGAGA         | DR2       | -337          |
| 3825  | TGTGCAatgggAGCACA       | DR5       | -176          |
| 3845  | GGATGAagAGCTCA          | DR2       | -156          |
| 3853  | TCTTCAccacAGGTCA        | DR5       | -148          |
| 3942  | AGGACAgcCTGGCA          | DR2       | -59           |
| 3953  | AGGTGAgggcaAGGACA       | DR5       | -48           |
| 4003  | AGATCAccAGATCT          | DR2       | 3             |
| 4031  | AGGTGAgaggcAGATCC       | DR5       | 31            |

**Table S3: Predicted RARE sequences in the mouse Saa2 promoter**

| mSAA2 | Predicted RARE sequence | RARE type | RARE location |
|-------|-------------------------|-----------|---------------|
| 334   | GGTACAcaGTGTCA          | DR2       | -3667         |
| 433   | AGGACTggttgAGAGCA       | DR5       | -3568         |
| 522   | AGGGCAgaGGTAGA          | DR2       | -3479         |
| 1130  | GGGCCAagAGAACG          | DR2       | -2871         |
| 1166  | GGGTCAagagcAGCCAA       | DR5       | -2835         |
| 1277  | AGCACAtagcAGGGCC        | DR5       | -2724         |
| 1489  | AGATCTcaTGTGCA          | DR2       | -2512         |
| 1630  | GGATCAtctcaAGTGCC       | DR5       | -2371         |
| 1702  | AAGTGAgttccAGGACA       | DR5       | -2299         |
| 1878  | AGATGAgagacTGGGCA       | DR5       | -2123         |
| 2096  | AGTGCagctatGGGGCA       | DR5       | -1905         |
| 2148  | AAGCCActGGTCCA          | DR2       | -1853         |
| 2155  | TGGTCCacaagAGGACA       | DR5       | -1846         |
| 2271  | AGTACAgcAGGACT          | DR2       | -1730         |
| 2428  | AAGTCAtgcagTGGTCA       | DR5       | -1573         |
| 2433  | AATTCaagAGTTTA          | DR2       | -1568         |
| 2471  | AGGGGAacTGGGCA          | DR2       | -1530         |
| 2564  | GGGGCAgtttaATGTCA       | DR5       | -1437         |
| 2572  | AGGTCTgtGGGGCA          | DR2       | -1429         |
| 2583  | AGGACCctggtAGGTCT       | DR5       | -1418         |
| 3413  | AGTGTAatattTGTTCA       | DR5       | -588          |
| 3421  | AGCTCAttAGTGTA          | DR2       | -580          |
| 3670  | TGTTCCtgcagAGAACA       | DR5       | -331          |
| 3813  | AGCACAggAGACAA          | DR2       | -188          |
| 3824  | TGTGCAatgggAGCACA       | DR5       | -177          |
| 3844  | GGATAAagAGCTCA          | DR2       | -157          |
| 3941  | AGGACAgcCTGGCA          | DR2       | -60           |
| 3958  | TGCTCAggtgaGGGGCA       | DR5       | -43           |
| 4003  | AGACCAccAGATCT          | DR2       | 3             |
| 4031  | AGGTGAgaggcAGATCC       | DR5       | 31            |

**Table S4: PCR primers for predicted RAREs in mouse *Saa3* promoter**

| Target Sequence in mSAA3 promoter                    | Forward Primers (5' to 3')                                                                          | Reverse Primers (5' to 3')                                                                        |
|------------------------------------------------------|-----------------------------------------------------------------------------------------------------|---------------------------------------------------------------------------------------------------|
| RARE -3895<br>RARE -3556                             | GCAAAGAGGAAATGCTGGAAAG<br>AAAGTTCTGGCAACTCACCTC                                                     | TCAAACAGGGATTGCTCCATTA<br>TAGATATCCTCGGCCACATCTC                                                  |
| RARE -3895                                           | GCTGCGAGCTCCTTCTG                                                                                   | GGGTAAGTGGGATTATGCAAGA                                                                            |
| RARE -3556<br>RARE -3537                             | CGCCATCCTGGTTGGAATAA<br>TCATGGGATCCAATCAAAGG<br>ATGCTTTATATCCAGTTCTTGGG                             | CCCATCCTCCTGTTCCCTAA<br>TGCTCCCTGACCTTCCATA<br>CAGCGTTGGGTGCTAAATG                                |
| RARE -3142<br>RARE -2949                             | CATTTGGCCTCCTGCTCTAA                                                                                | CCTTCCAGCTTACGAGGTTTAT                                                                            |
| RARE -3142                                           | TTGCCGTGGGAGTTTATCTTAT<br>CAGCTGCTAGAGCCAGAAA<br>GCAAGAGGAGACACAGGAATG                              | GCAGCTATACCGTCCTTCTTT<br>GTGATACCTTCACCACACCTAC<br>CCTTCTTTCTCTAGGGAECTCAATAC                     |
| RARE -2949                                           | GGTGTGGTGAAGGTATCACAT<br>GAAGCAGAGGAAAGCAGAGG<br>CCTAGAGAAAGAAGGACGGTATAG                           | CGAGATAGCCACAGTTCTCTTC<br>CGGGTATTATTCACCACCTTCC<br>CTTGGTAGCAAACAACCTTGGG                        |
| RARE -2490<br>RARE -2479                             | GCTGCCTTTGGCTTAGGA<br>TGGTCTCAGCCAAGACA                                                             | AATCCCGGAACCAAATGTTTATG<br>GCCTAGGAAGTCAGAACAAAGG                                                 |
| RARE -2490                                           | GCTCTGTGACTGAAAGGGAAA                                                                               | GGGAAGTTGTAGCTGCTTACTG                                                                            |
| RARE -2479                                           | AGTAAGCAGCTACAACCTTCCC                                                                              | GTGGCTGAGGAAGTCAATACA                                                                             |
| RARE -2230<br>RARE -2116                             | CCTCCCTCTCGTCCCTTT<br>CCAAATGGATGCATGTGACC                                                          | CCAGAGGACCTGGGTTTAATTC<br>GTACTCATGGTAGCTCACAAC                                                   |
| RARE -2007                                           | CCAAATGGATGCATGTGACC                                                                                | AAAGGGTAAAGGGTGGATATGAG                                                                           |
| RARE -1915<br>RARE -1832                             | TCTTTGATAGAAGGCAAGTGAGT                                                                             | AAAGGGTAAAGGGTGGATATGAG                                                                           |
| RARE -1740<br>RARE -1737                             | GCAACCTTGCCCGAAATAAA<br>TCATATCCACCCTTTACCCTTTG                                                     | GTGAAGATGTGTGGACAGAAGA<br>CACAGTGACACACTCTAGCTTC                                                  |
| RARE -1563                                           | GTTCTCGGAACAAGTCCATT<br>TCTTCTGTCCACACATCTTCAC<br>GTCACTGTGTCTCTCCAATGTAT<br>CAGTACCAATACTGGGTCCTTT | GGCCCAGCTCACAATCTATATC<br>TGGGATTCAAGGGACAGTTATG<br>GCTGACCCAAAGCTGTAGAA<br>CATCTGAGAATGGCTGGGATT |
| RARE -1357<br>RARE -1310<br>RARE -1255<br>RARE -1244 | CTTTCCAATTGCCAGAAGTG                                                                                | GATTGCAACATTCTGGAGAGC                                                                             |
| RARE -1357<br>RARE -1310                             | GTTCACTGAGCTGGTCTCATATTC                                                                            | GCAGGAGTGTGGGAGAGT                                                                                |
| RARE -1357                                           | CCCAGCCATTCTCAGATGATATAG                                                                            | GTGGTGCTGGCACAGAG                                                                                 |
| RARE -1310<br>RARE -1255<br>RARE -1244               | GCTCATGACCCTGGGAATAG                                                                                | GGTCCCATCTCTACCAATAG                                                                              |

**Table S4 (cont.)**

| <b>Target Sequence in mSAA3 promoter</b>  | <b>Forward Primers (5' to 3')</b>                                     | <b>Reverse Primers (5' to 3')</b>                                        |
|-------------------------------------------|-----------------------------------------------------------------------|--------------------------------------------------------------------------|
| RARE -1160<br>RARE -1134<br>RARE -1058    | GAATGTTGCAATCAGTGAGGAG                                                | CAGCCTGAGATGATGGTGAA                                                     |
| RARE -1160                                | CTGCTGCTATTGGTGAGAGATG                                                | TGTTATCACTAGAGGACATGGAGATA                                               |
| RARE -1058                                | GGGATATCTCCATGTCTCTAGT                                                | GTGGAGCAGCTTGAGCATT                                                      |
| RARE -689<br>RARE -603                    | CTTCAAGCTAGGATGAACAGAGG                                               | GGGAAAGAGAGAAGAAAGCATCA                                                  |
| RARE -689                                 | CTGTGCTGCCTGGATATGAT<br>GGTCTGCAGGTGTCTATCTTC                         | CACCTTGATGTTGGCATTGTT<br>CCCTGGCAATGGGCATA                               |
| RARE -603                                 | GGAACAATGCCAACATCAAGG                                                 | CACACACTGGATTGGATGGA                                                     |
| RARE -463                                 | GTGTGAGCCAAGTCTCTTA<br>ACCCAGCTTGATGCTTTCT<br>CCATCCAATCCAGTGTGTGT    | ATCTTAGCATGGACGGTGTG<br>GGTGAGAAGCTATTGGCATTG<br>GCAGAGGAAGGGTTGGTTT     |
| RARE -327                                 | CACACCGTCCATGCTAAGAT<br>CAAATGCCAATAGCTTCTCACC<br>AACCAACCCTTCTCTGCTA | GGTAGAGGTGATGGTTGACTTC<br>CAAGAGGGTGGACTCACAAAG<br>GGACTGTGACAGCATTGCATA |
| RARE -224                                 | GAAGTCAACCATCACCTCTACC<br>CTTGTGAGTCCACCCTCTTG                        | AAATATCCTCGGACACACCATC<br>CAAGGTTCCGAGGGTCTTTT                           |
| RARE -116                                 | GATGGTGTGTCCGAGGATATTT<br>AAAGGACCCTCGAACCTTG                         | GACAGTGAGACAGATGACACAG<br>AAGAATCTGTGCGACAGTGA                           |
| RARE-11<br>RARE 15                        | CTGTGTCATCTGTCTCACTGTC<br>ACTGTGCGACAGATTCTTCTC                       | AACTAGCATGCTGTCCTCAA<br>AGGCTCAGTACCATCAAAC                              |
| RARE 15                                   | CTGTGGGTTGGGATCTTGT                                                   | CTTTAGAGTGCTCCTCCAGTG                                                    |
| RARB RARE<br>Positive<br>Control          | CGGGTAGGGTTCACCGAAAGTTCACCTCGCA                                       | TGCGAGTGAACCTTCGGTGAACCCTACCCG                                           |
| H3K27Ac<br>Binding<br>Positive<br>Control | TCTCCCTAAACTCTTCCACTCG                                                | ATGTGCCTAAAACGCATCACTACTA                                                |
| H3K27Ac<br>Binding<br>Negative<br>Control | ACAACTGAGGGGAGGAGAGAAG                                                | GCTGCATTTGTTTTTCATTTCAGT                                                 |

**Table S5: qPCR primers for gene expression assays**

| <b>Target gene</b> | <b>Forward Primer (5' to 3')</b> | <b>Reverse Primer (5' to 3')</b> |
|--------------------|----------------------------------|----------------------------------|
| mouse <i>Gapdh</i> | TGGCAAAGTGGAGATTGTTGCC           | AAGATGGTGATGGGCTTCCCG            |
| mouse <i>Saa1</i>  | ATCACCAGATCTGCCAGGA              | CCTTGAAAGCCTCGTGAAC              |
| mouse <i>Saa2</i>  | ACCAGATCTGCCAGGAGAC              | GCATGGAAGTATTTGTCTCCATCT         |
| mouse <i>Saa3</i>  | GACATGTGGCGAGCCTACTC             | TTGGCAAAGTGGTCAGCTCT             |
| human <i>GAPDH</i> | CCTGGTCACCAGGGCTGCTTTTAAC        | GTCGTTGAGGGCAATGCCAGCC           |
| human <i>SAA1</i>  | GGCATAACAGCCATACCATTTC           | CCTTTTGGCAGCATCATAGT             |
| human <i>SAA2</i>  | GCTTCCTCTTCACTCTGCTCT            | TGCCATATCTCAGCTTCTCTG            |



**Table S6. siRNA probe sequences for targeted gene silencing**

| <b>Target gene</b> | <b>Probe Sequences</b>                                                                   |
|--------------------|------------------------------------------------------------------------------------------|
| human <i>RARA</i>  | GCAAUACACUACGAACAA<br>CCAAGGAGUCUGUGAGAAA<br>GAGCAGCAGUUCUGAAGAG<br>GAACAACGUGUCUCUCUGG  |
| human <i>RARB</i>  | CAGCUGAGUUGGACGAUCU<br>CGAGAUAGAACUGUGUUA<br>GGCCUUACCCUAAAUCGAA<br>UCACAGAUCUCCGUAGCAU  |
| human <i>RARG</i>  | GAAAGGGCCAUUACUCUGA<br>CAAGGAAGCUGUGCGAAAU<br>GGAGAACCUGAAAUGUUU<br>UAGAAGAGCUCAUACCAA   |
| mouse <i>Rara</i>  | GCAAGUACACUACGAACAA<br>AAGACAAAUCAUCCGGCUA<br>CGGUGCGAAACGAUCGAAA<br>CGAAUCUGCACGCGGUACA |
| mouse <i>Rarb</i>  | GAUAAGAACUGCGUCAUUA<br>GAAAGGUGCCGAACGUGUA<br>GAUCUACACUUGCCAUCGA<br>AAGAGUCUGUUAGGAAUGA |
| mouse <i>Rarg</i>  | GUAAGGAACGAUCGAAACA<br>GCGGAUCUGUACAAGGUAU<br>GCAGGACACUAUGACAUUC<br>GGAGCAGGCUUCCCAUUCG |
